# Supplementary material
Source: PubMed Central journal article supplement (PMC2784026)

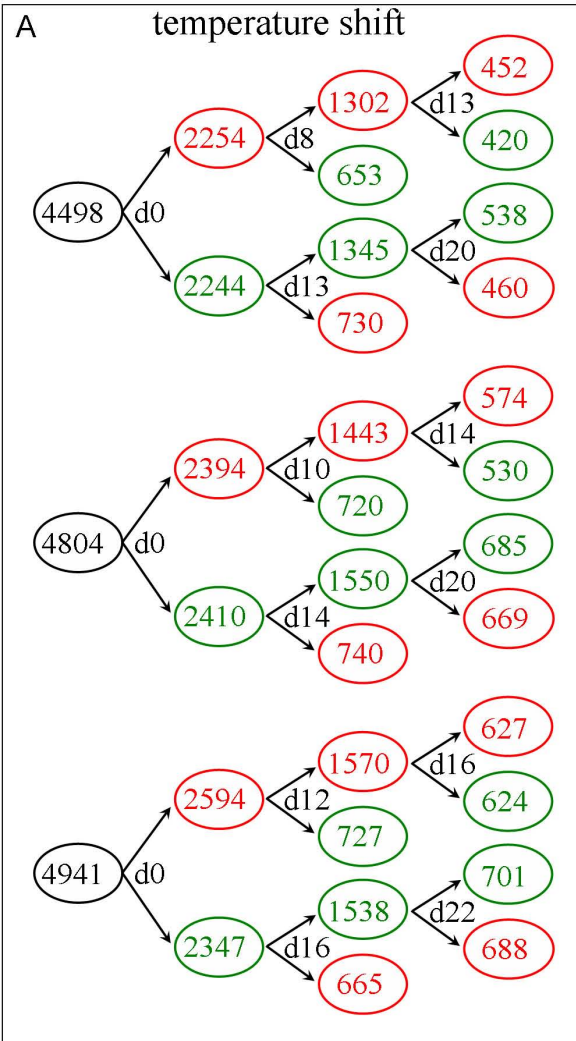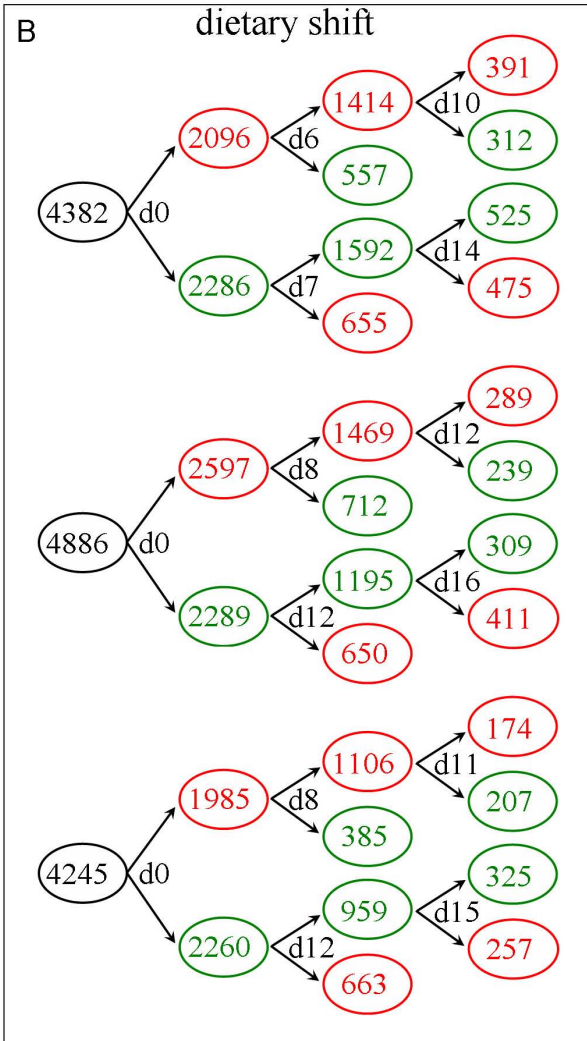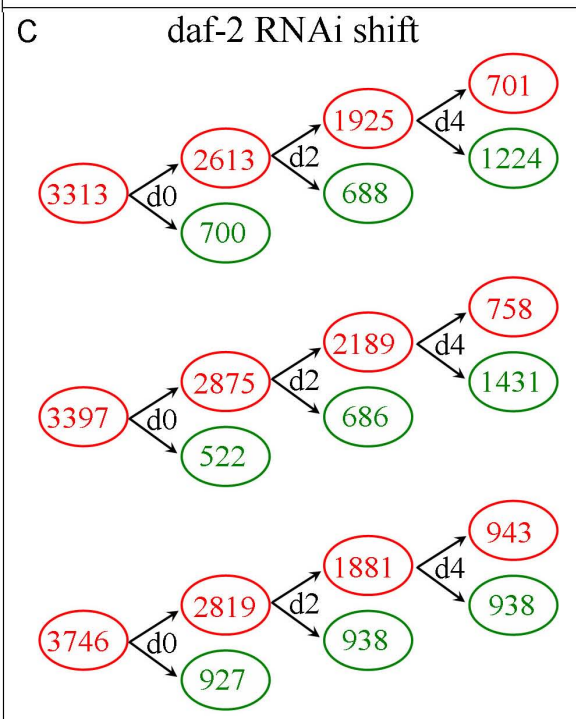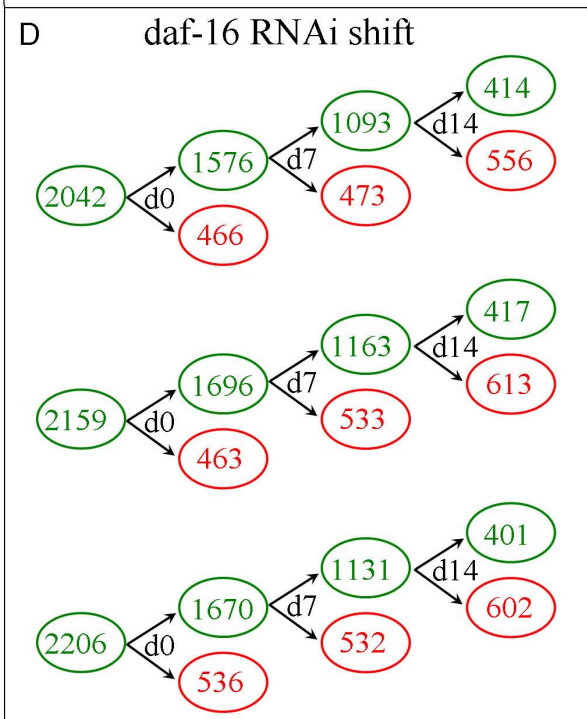

Supplement: NIHMS151149-supplement-Supp_figure_S1.pdf [file NIHMS151149-supplement-Supp_figure_S1.pdf]
